# Supplementary material for: Screening of ordinary commercial varieties of apple fruits under different storage conditions for their potential vascular and metabolic protective properties
Source: Royal Society of Chemistry journal article supplement (doi:10.1039/c8fo00967h), 2018-01-01
Supplement: c8fo00967h3.pdf [file c8fo00967h3.pdf]

**Supplemental Figure 1. Effect of apple extracts on macrophages.** Raw 264.7 were treated with  $10^{-2}$  and  $10^{-5}$ g/L of apple extracts with either EtOH or DMSO for 1h and then treated or not with LPS for further 23h. Then, IL-6 production was quantified. In diagram, x-axis and y-axis expressed percentage response values of ethanol and DMSO extracts, respectively. In each diagram, high (H) and low (L) concentrations are represented and each dot is the mean of a triplicate of 2 biological repetitions per condition. Variations of 20% of responses (included in dot lines) were considered not biologically significant. This panel displayed results of evidenced apple varieties and storage conditions.

**Supplemental Figure 2. Whole bioactivity variance.** Two dimensional plots for dimensions 2 and 3 from PCA analysis showing (A) individual factor map and (B) variables factor map. (A) Apple samples and confidence ellipse at 95% are colored according to the variety. Apple samples are named according to the variety (GA: Gala, GD: Golden Delicious, GS: Granny Smith and PL: Pink Lady), the storage conditions (HV: harvest, CC: classic cold, CA: controlled atmosphere and XO: extreme low oxygen) and the concentration used for the test (H: high or L: low). (B) Variables are named according to the cell type (HUVECs, HASMCs, HepG2, 3T3-L1 = X3T3.L1 and Raw = Raw 264.7), the test (OS: oxidative stress, CP: cell proliferation, CA: cell apoptosis, LA: lipid accumulation and IL.6: Interleukin-6) and the type of extract (D: DMSO or E: Ethanol).

**Supplemental Figure 3. Whole bioactivity variance.** Two dimensional plots for dimensions 1 and 2 from PCA analysis showing (A) individual factor map and (B) variables factor map. (A) Apple samples and confidence ellipse at 95% are colored according to the storage conditions. Apple samples are named according to the variety (GA: Gala, GD: Golden Delicious, GS: Granny Smith and PL: Pink Lady), the storage conditions (HV: harvest, CC: classic cold, CA: controlled atmosphere and XO: extreme low oxygen) and the concentration used for the test (H: high or L: low). (B) Variables are named according to the cell type

(HUVECs, HASMCs, HepG2, 3T3-L1 = X3T3.L1 and Raw = Raw 264.7), the test (OS: oxidative stress, CP: cell proliferation, CA: cell apoptosis, LA: lipid accumulation and IL.6: Interleukin-6) and the type of extract (D: DMSO or E: Ethanol).
